# Supplementary material for: A National, Palliative Care Competency Framework for Undergraduate Medical Curricula
Source: MDPI journal article supplement (doi:10.3390/ijerph17072396), 2020-04-01
Supplement: s1 [file s1]

## Supplementary Materials

**Table S1.** Panel Members' Mean Ratings of Each Enabling Competency in Palliative Care and their Standard Deviations, Divided into Six Categories (*N* panel members = 54) (1–6 scale; 1= graduate does not require this competency; 6= graduate must be able to practise this competency with little guidance).

| Key Competency              | Enabling Competency                                                                                                                                                                                                                          | Mean | SD    |
|-----------------------------|----------------------------------------------------------------------------------------------------------------------------------------------------------------------------------------------------------------------------------------------|------|-------|
| Junior doctor is able to:   |                                                                                                                                                                                                                                              |      |       |
| Communication               | Mark the palliative phase.                                                                                                                                                                                                                   | 4.33 | 0.824 |
|                             | Communicate with respect and empathy with patients and loved ones.                                                                                                                                                                           | 5.02 | 0.961 |
|                             | Adapt to the different ways of communicating.                                                                                                                                                                                                | 4.70 | 1.002 |
|                             | Take diversity into consideration and adjust the content and communication style (e.g. with regard to cultural aspects or beliefs) when communicating with the patient.                                                                      | 4.65 | 0.974 |
|                             | Keep patients and loved ones informed about the expected course, treatment and care options.                                                                                                                                                 | 4.39 | 0.712 |
|                             | Discuss the expectations and wishes of the patient and their relatives with regard to the course of the illness, treatment, care process and manner of death.                                                                                | 4.52 | 0.746 |
|                             | Make the four dimensions of palliative care open to discussion with the patient and loved ones.                                                                                                                                              | 4.13 | 0.674 |
| Advance care planning       | Integrate disease-oriented and symptom-focused care at an early stage*.                                                                                                                                                                      | 3.38 | 0.906 |
|                             | Commit to shared decision-making in setting policy with regard to the course of the illness, treatment, care process and manner of death.                                                                                                    | 4.13 | 0.674 |
|                             | Act proactively at the various stages of palliative care and anticipate potential complications*.                                                                                                                                            | 3.81 | 0.779 |
|                             | (With regard to diagnosis and treatment) take into account both the quantity and quality of life (e.g. avoids under- and over-diagnostics and weighs up diagnostic processes).                                                               | 4.37 | 0.681 |
|                             | Apply evidence-based principles from the literature, protocols and guidelines from the field of palliative care when it comes to making their own clinical decisions.                                                                        | 4.30 | 0.833 |
|                             | Explicitly discuss the patient's wishes for the end of life (including euthanasia and treatment limitations).                                                                                                                                | 4.43 | 0.716 |
|                             | Act in accordance with legislation and regulations when making decisions to do with the end of life: stopping fluid/nutrition, palliative sedation, euthanasia and assisted suicide*.                                                        | 3.72 | 0.920 |
| Pain and symptom management | Exhibit awareness of the ethical and moral dilemmas surrounding the end of life. When necessary, discusses these issues with the patient, loved ones and care providers involved and acts according to the outcome of these considerations*. | 3.89 | 0.793 |

|                                     |                                                                                                                                                                                                                                                                                                                                    |      |       |
|-------------------------------------|------------------------------------------------------------------------------------------------------------------------------------------------------------------------------------------------------------------------------------------------------------------------------------------------------------------------------------|------|-------|
|                                     | (During the palliative phase) treat problems arising from common syndromes (e.g. heart failure, COPD, cancer and dementia).                                                                                                                                                                                                        | 4.17 | 0.818 |
|                                     | (When setting policy) take into account and, if necessary, treat the most common emergencies arising in the palliative phase, such as delirium, (imminent) spinal cord injury, massive (lung) bleeding, vena cava superior syndrome, ileus, retention bladder, acute dyspnoea, suffocation, exhaustion, pain, existential crisis*. | 3.96 | 0.868 |
|                                     | Systematically identify the most common symptoms in the palliative phase, such as pain, congested breathing, confusion, nausea and vomiting, anxiety and itching, and treat these with and without medication.                                                                                                                     | 4.26 | 0.894 |
|                                     | Recognise and consider the feelings of patients and relatives and the influence these have on the well-being of those involved.                                                                                                                                                                                                    | 4.63 | 0.958 |
|                                     | Systematically evaluate the psychological health of the patient, and provide treatment and support or refer the patient [to a professional].                                                                                                                                                                                       | 4.11 | 0.793 |
|                                     | Recognise the different coping strategies that patients and relatives use, adapt their own behaviour and communication accordingly and call in expertise and/or professional guidance as needed*.                                                                                                                                  | 3.91 | 0.896 |
|                                     | Recognise the different ways of mourning, adapt their own behaviour and communication accordingly and call in expertise and/or professional guidance, if needed*.                                                                                                                                                                  | 4.07 | 0.949 |
|                                     | Signal when informal care providers get overloaded and offer support/referral, if necessary*.                                                                                                                                                                                                                                      | 3.80 | 0.979 |
|                                     | Examine the patient's social context, including financial capacity and the legal and practical issues concerning end of life, and consider its influence on the patient's palliative care. Refers the patient to extra support, if required*.                                                                                      | 3.56 | 1.022 |
|                                     | Provide space for spiritual, existential and religious topics in conversations with patients and their loved ones and refer them to specific care on request*.                                                                                                                                                                     | 3.85 | 0.856 |
| <hr/>                               |                                                                                                                                                                                                                                                                                                                                    |      |       |
| Multidisciplinary team              |                                                                                                                                                                                                                                                                                                                                    |      |       |
|                                     | Work in a multidisciplinary and interdisciplinary team; exhibit familiarity with the duties and responsibilities of the other health care professionals involved.                                                                                                                                                                  | 4.26 | 0.805 |
|                                     | Take advantage of opportunities for consultation in palliative care and, to this end, consult experts within and outside the institution.                                                                                                                                                                                          | 4.35 | 0.828 |
|                                     | Organise the care chain, taking management into account*.                                                                                                                                                                                                                                                                          | 3.52 | 1.112 |
|                                     | Refer the patient directly to palliative care organisations that can provide care and support to palliative patients and their relatives (e.g. patient associations, informal caregiver support centres, and network organisations for palliative care) *.                                                                         | 3.70 | 0.944 |
|                                     | Arrange complementary care, if desired*.                                                                                                                                                                                                                                                                                           | 3.43 | 1.092 |
| <hr/>                               |                                                                                                                                                                                                                                                                                                                                    |      |       |
| End of life                         |                                                                                                                                                                                                                                                                                                                                    |      |       |
|                                     | Treat problems arising in the terminal phase, including stopping infusions and palliative sedation.                                                                                                                                                                                                                                | 4.19 | 0.779 |
|                                     | Determine the time and cause of death and fill in the death certificate.                                                                                                                                                                                                                                                           | 4.67 | 1.213 |
|                                     | Guide the loved ones directly in the period around the death.                                                                                                                                                                                                                                                                      | 4.56 | 0.965 |
| <hr/>                               |                                                                                                                                                                                                                                                                                                                                    |      |       |
| Personal development and well-being |                                                                                                                                                                                                                                                                                                                                    |      |       |

|                                                                                                                         |      |       |
|-------------------------------------------------------------------------------------------------------------------------|------|-------|
| Exhibit awareness of their own feelings and know what effect they have or can have on their own attitude and behaviour. | 4.46 | 0.985 |
| Reflect on distance (objectivity) and proximity in the treatment relationship with a palliative patient.                | 4.30 | 0.903 |
| Exhibit knowledge of their personal responsibility as a health care professional and the limits thereof.                | 4.57 | 0.983 |
| Recognise signs of their own overload and, if necessary, seek adequate help.                                            | 4.54 | 1.004 |
| Reflect on their own spiritual and existential experiences around life and death*.                                      | 3.87 | 0.933 |
| Reflect on own values and norms in the field of palliative care.                                                        | 4.24 | 0.845 |
| Act professionally with due regard to both personal and professional values and norms.                                  | 4.69 | 1.006 |

\* No consensus (lower than 75%) found
